# Supplementary material
Source: PubMed Central journal article supplement (PMC3308759)
Supplement: supp_M111.331728_jbc.M111.331728-1.pdf [file supp_M111.331728_jbc.M111.331728-1.pdf]

## Supplemental Data

### **The vital role of pol $\zeta$ and REV1 in mutagenic, but not correct, DNA synthesis across benzo[*a*]pyrene-dG and the recruitment of pol $\zeta$ by REV1 to a replication-stalled site**

Keiji Hashimoto, Youngjin Cho, In-Young Yang, Jun-ichi Akagi, Eiji Ohashi, Satoshi Tateishi, Niels de Wind, Fumio Hanaoka, Haruo Ohmori, and Masaaki Moriya

#### Table of Contents

#### Supplemental Tables

Table S1 – Page S-2

Table S2 – Page S-2

#### Supplemental Figures

Figure S1 – Page S-3

Figure S2 – Page S-4

Figure S3 – Page S-5

Figure S4 – Page S-6

Figure S5 – Page S-7

#### Supplemental References

Page S-8

## Supplemental Tables

**Table S1. TLS events for BPDE-dG and H-εdC in double and triple-gene knockout MEFs**

| DNA lesion   | MEFs                                                                                    | TLS efficiency <sup>a</sup> | Total effective no. sequenced | No. and % of coding events detected |                        |           |                       |         |
|--------------|-----------------------------------------------------------------------------------------|-----------------------------|-------------------------------|-------------------------------------|------------------------|-----------|-----------------------|---------|
|              |                                                                                         |                             |                               | G*→T                                | G*→A                   | G*→G      | G*→C                  | Others  |
| BPDE-dG (G*) | Wild-type                                                                               | 1.68 (100%)                 | 86<br>100%                    | 63<br>73%                           | 10<br>12%              | 8<br>9%   | 1<br>1%               | 4<br>5% |
|              | <i>Polk</i> <sup>-/-</sup> <i>Polh</i> <sup>-/-</sup> <i>Poli</i> <sup>-/-</sup> (2091) | 1.31 (78%)                  | 95<br>100%                    | 65<br>68%                           | 14<br>15%              | 11<br>12% | 1<br>1%               | 4<br>4% |
|              | <i>Polk</i> <sup>-/-</sup> <i>Poli</i> <sup>-/-</sup>                                   | 1.01 (60%)                  | 95<br>100% <sup>b</sup>       | 51<br>54% <sup>c</sup>              | 21<br>22%              | 14<br>15% | 4<br>4%               | 5<br>5% |
|              | <i>Polh</i> <sup>-/-</sup> <i>Poli</i> <sup>-/-</sup>                                   | 1.03 (61%)                  | 94<br>100% <sup>b</sup>       | 41<br>44% <sup>c</sup>              | 23<br>24% <sup>c</sup> | 14<br>15% | 9<br>10% <sup>c</sup> | 7<br>7% |
|              |                                                                                         |                             |                               | C*→T                                | C*→A                   | C*→G      | C*→C                  | Others  |
| H-εdC (C*)   | Wild-type                                                                               | 0.802 (100%)                | 90<br>100%                    | 54<br>60%                           | 33<br>37%              | 2<br>2%   | 1<br>1%               | 0<br>0% |
|              | <i>Polk</i> <sup>-/-</sup> <i>Polh</i> <sup>-/-</sup> <i>Poli</i> <sup>-/-</sup> (2091) | 0.165 (21%)                 | 94<br>100%                    | 56<br>60%                           | 35<br>37%              | 3<br>3%   | 0<br>0%               | 0<br>0% |

Colors used in coding events correspond to those used in Fig. 2.

<sup>a</sup> Number of ampicillin/blastidicin-resistant transformants divided by that of kanamycin-resistant (internal control) transformants.

<sup>b</sup> The distribution of coding events are statistically significant at  $p < 0.001$  when compared with that in wild-type cells. Highlighted with a grey background.

<sup>c</sup>  $p < 0.001$  when compared with the corresponding event in wild-type cells. Highlighted with a grey background.

**Table S2. TLS events for BPDE-dG in single-gene knockout MEFs**

| DNA lesion   | MEFs                        | TLS efficiency <sup>a</sup> | Total effective no. sequenced | No. and % of coding events detected |                       |                        |         |          |
|--------------|-----------------------------|-----------------------------|-------------------------------|-------------------------------------|-----------------------|------------------------|---------|----------|
|              |                             |                             |                               | G*→T                                | G*→A                  | G*→G                   | G*→C    | Others   |
| BPDE-dG (G*) | Wild-type                   | 5.72 (100%)                 | 92<br>100%                    | 68<br>74%                           | 14<br>15%             | 6<br>7%                | 1<br>1% | 3<br>3%  |
|              | <i>Rev1</i> <sup>-/-</sup>  | 2.34 (41%)                  | 88<br>100% <sup>b</sup>       | 28<br>32% <sup>c</sup>              | 16<br>18%             | 42<br>48% <sup>c</sup> | 1<br>1% | 1<br>1%  |
|              | <i>Rev3L</i> <sup>-/-</sup> | 0.76 (13%)                  | 94<br>100% <sup>b</sup>       | 6<br>6% <sup>c</sup>                | 0<br>0% <sup>##</sup> | 88<br>94% <sup>c</sup> | 0<br>0% | 0<br>0%  |
|              | <i>Rad18</i> <sup>-/-</sup> | 1.50 (26%)                  | 191<br>100% <sup>b</sup>      | 108<br>57% <sup>c</sup>             | 15<br>8%              | 55<br>29% <sup>c</sup> | 3<br>2% | 10<br>5% |

Refer to the legend to Table S1.

## Supplemental Figures

**Figure S1. Genotyping of triple- and double-gene knockout MEFs by genomic PCR.** PCR was performed at 94°C for 30 seconds, 55°C for 30 seconds, and 72°C for 1 min with 45 cycles using following primer sets. **A** and **B** (*Polh*), the wild-type, but not the mutant, *Polh* allele produced a 1.9-kb fragment with a primer set of 5'TTTCGATCTTTGGTTAGCCTCTCC and 5'GTAGTCTGGGGGGTTGAATC (**A**). The mutant, but not the wild-type, *Polh* allele, produced a 1.4-kb fragment with a primer set of 5'GTAGTCTGGGGGGTTGAATC and 5'GTCTGTTGTGCCCAGTCATAGC (**B**). Refer to ref. S1. **C** (*Polk*), the wild-type, but not the mutant, *Polk* allele produced a 300-bp fragment with a primer set of 5'GCACTGATCGATATGTCCATTTAGGG and 5'GTGAGACCAAACCTTGACAGGCTAAG. **D** (*Poli*), the wild-type and mutant *Poli* alleles produced 49- plus 39-bp fragments and a 88-bp fragment, respectively, following Taq<sup>o</sup>I digestion of PCR products amplified with a primer set of 5'-CAGTTTGCAGTCAAGGGCC and 5'-TCGACCTGGGCATAAAAGC. Refer to ref. S2. Two independent lines (91, TKO line #2091 and 95, TKO line #2095) of triple-gene knockout (*k/h/i*) MEFs were examined. "wt" represents a wild-type MEF. Size markers (M) are 1-kb ladder for **A** and **B**, 100-bp ladder for **C**, and 25-bp ladder for **D**. Diagnostic fragments are indicated by white arrows.

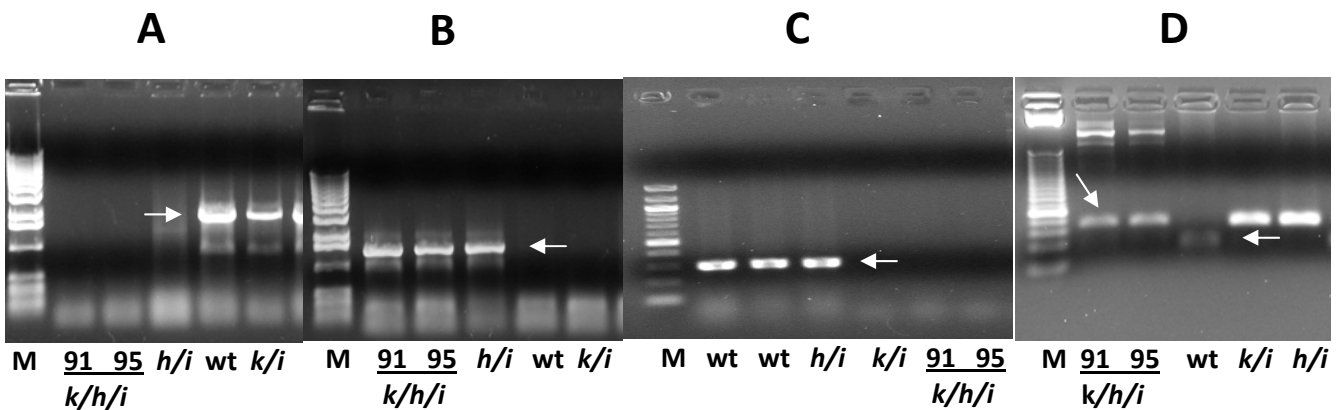

**Figure S2. Clonogenic UV sensitivity assay of various Y-family polymerase-defective MEFs.** Four hundred cells were seeded in a 10-cm plate and irradiated with UV-C. Cells were cultured for 10-14 days, after which colonies were counted with crystal violet staining. Dark blue, wild-type; light blue, *Polk*<sup>-/-</sup>; green, *Polk*<sup>-/-</sup> *Poli*<sup>-/-</sup>; pink, *Polh*<sup>-/-</sup>; orange, *Polk*<sup>-/-</sup> *Polh*<sup>-/-</sup> *Poli*<sup>-/-</sup> (#2091); red, *Polk*<sup>-/-</sup> *Polh*<sup>-/-</sup> *Poli*<sup>-/-</sup> (#2095).

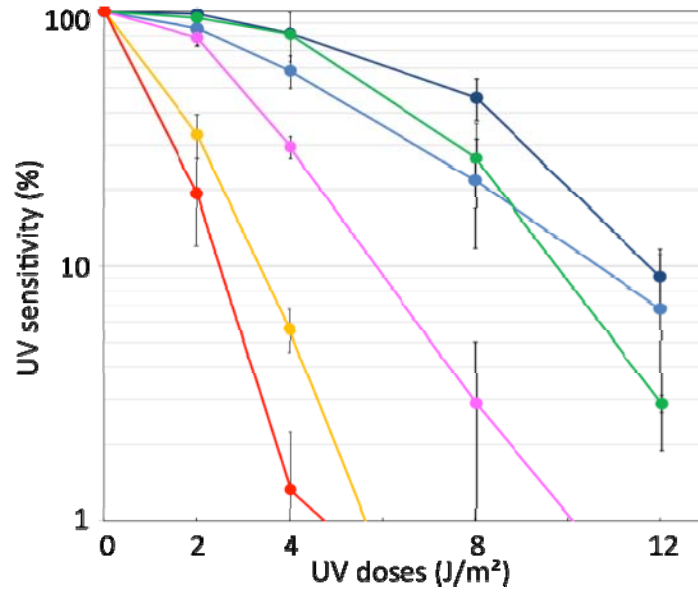

**Figure S3. Examples of colony hybridization with oligonucleotide probes.** Refer to Fig. 1 for the locations and sequences of oligonucleotide probes used. Colonies showing positive hybridization signals for both L and R probes are considered to be derived from TLS. *E. coli* transformants that did not hybridized with L or R probe were excluded from analysis. Probes T and C detect BPDE-dG→T and BPDE-dG→C transversions, respectively.

**Probe L**

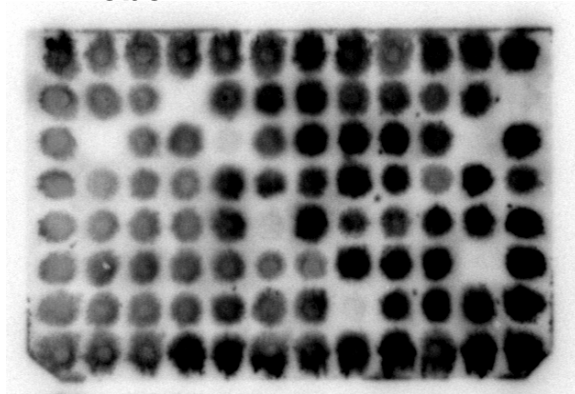

**Probe T**

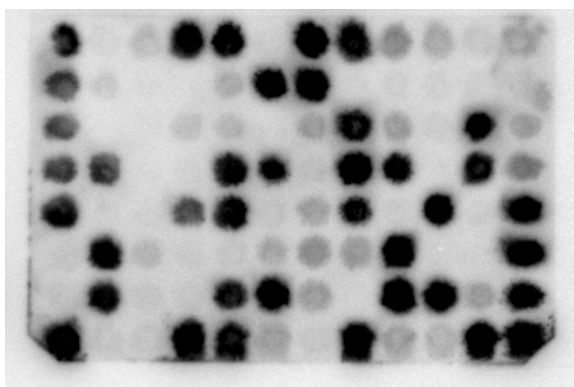

**Probe R**

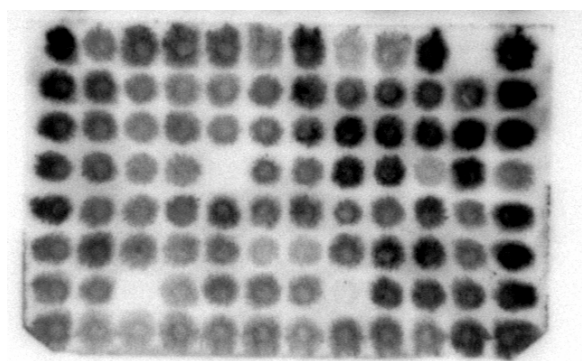

**Probe C**

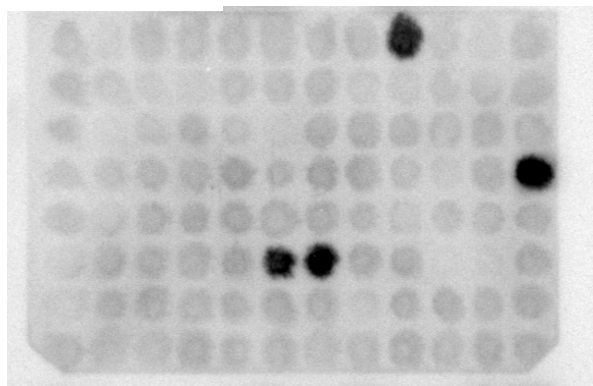

**Figure S4. Immunoblot analysis of *RevI*<sup>-/-</sup> mouse embryonic fibroblasts complemented with hREV1.** Human REV1 (1251 amino acids) and its C-terminal deletion mutant (1-1140 amino acids) tagged with 3×FLAG (140 and 128 kDa, respectively) were expressed in *RevI*<sup>-/-</sup> mouse cells. Anti-FLAG monoclonal antibody (M2, Sigma) was used to detect tagged hREV1. lane 1, protein marker; lane 2, *RevI*<sup>-/-</sup> cells; lane 3, *RevI*<sup>-/-</sup> cells complemented with hREV1 (1-1140); lane 4, *RevI*<sup>-/-</sup> cells complemented with hREV1 (1-1251); \*, hREV1 (1-1140); \*\*, hREV1 (1-1251).

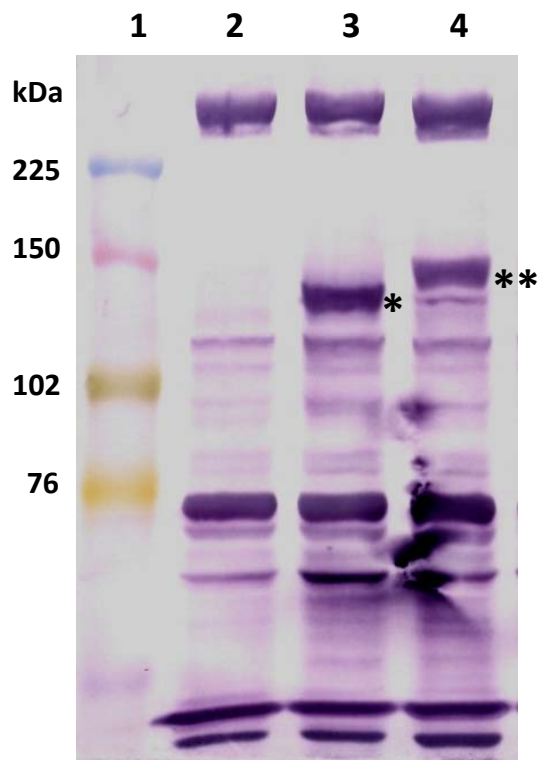

**Figure S5. Sensitivity of *RevI*<sup>-/-</sup> mouse embryonic fibroblasts complemented with hREV1 or C-terminal truncated hREV1 to 4-nitroquinoline-*N*-oxide (4NQO).** Cells were treated with 0.25, 0.5, and 1  $\mu$ M 4NQO for 1 h, after which the treatment medium was replaced with a fresh medium. Cells were cultured for 2 days, and the number of viable cells was determined by the Cell Titer 96 AQueous One Solution Cell Proliferation Assay (Promega). open circle, hREV1(1-1251); closed triangle, hREV1 C-terminal deletion mutant (1-1140); closed circle, *RevI*<sup>-/-</sup> cells.

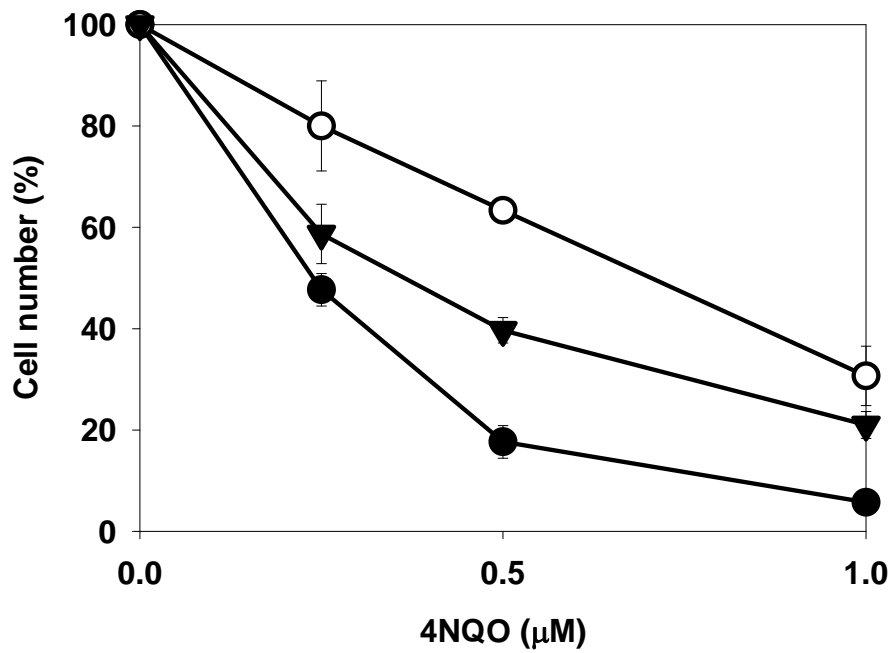

## Supplemental References

- S1. Ohkumo, T., Kondo, Y., Yokoi, M., Tsukamoto, T., Yamada, A., Sugimoto, T., Kanao, R., Higashi, Y., Kondoh, H., Tatematsu, M., Masutani, C., and Hanaoka, F. (2006) *Mol. Cell. Biol.* **26**, 7696-7706
- S2. McDonald, J.P., Frank, E.G., Plosky, B.S., Rogozin, I.B., Masutani, C., Hanaoka, F., Woodgate, R., and Gearhart, P.J. (2003) *J. Exp. Med.* **198**, 635-643
